# Supplementary material for: Cryo-EM structures of lipopolysaccharide transporter LptB2FGC in lipopolysaccharide or AMP-PNP-bound states reveal its transport mechanism
Source: PubMed Central journal article supplement (PMC6744409; doi:10.1038/s41467-019-11977-1), 2019-09-13
Supplement: 41467_2019_11977_MOESM1_ESM.pdf [file 41467_2019_11977_MOESM1_ESM.pdf]

## **Supplementary information**

**Cryo-EM structures of lipopolysaccharide transporter LptB<sub>2</sub>FGC in lipopolysaccharide or AMP-PNP-bound states reveal its transport mechanism**

**X. Tang et al.**

**Supplementary Figures 1-13 and Supplementary Table 1 and Table 2.**

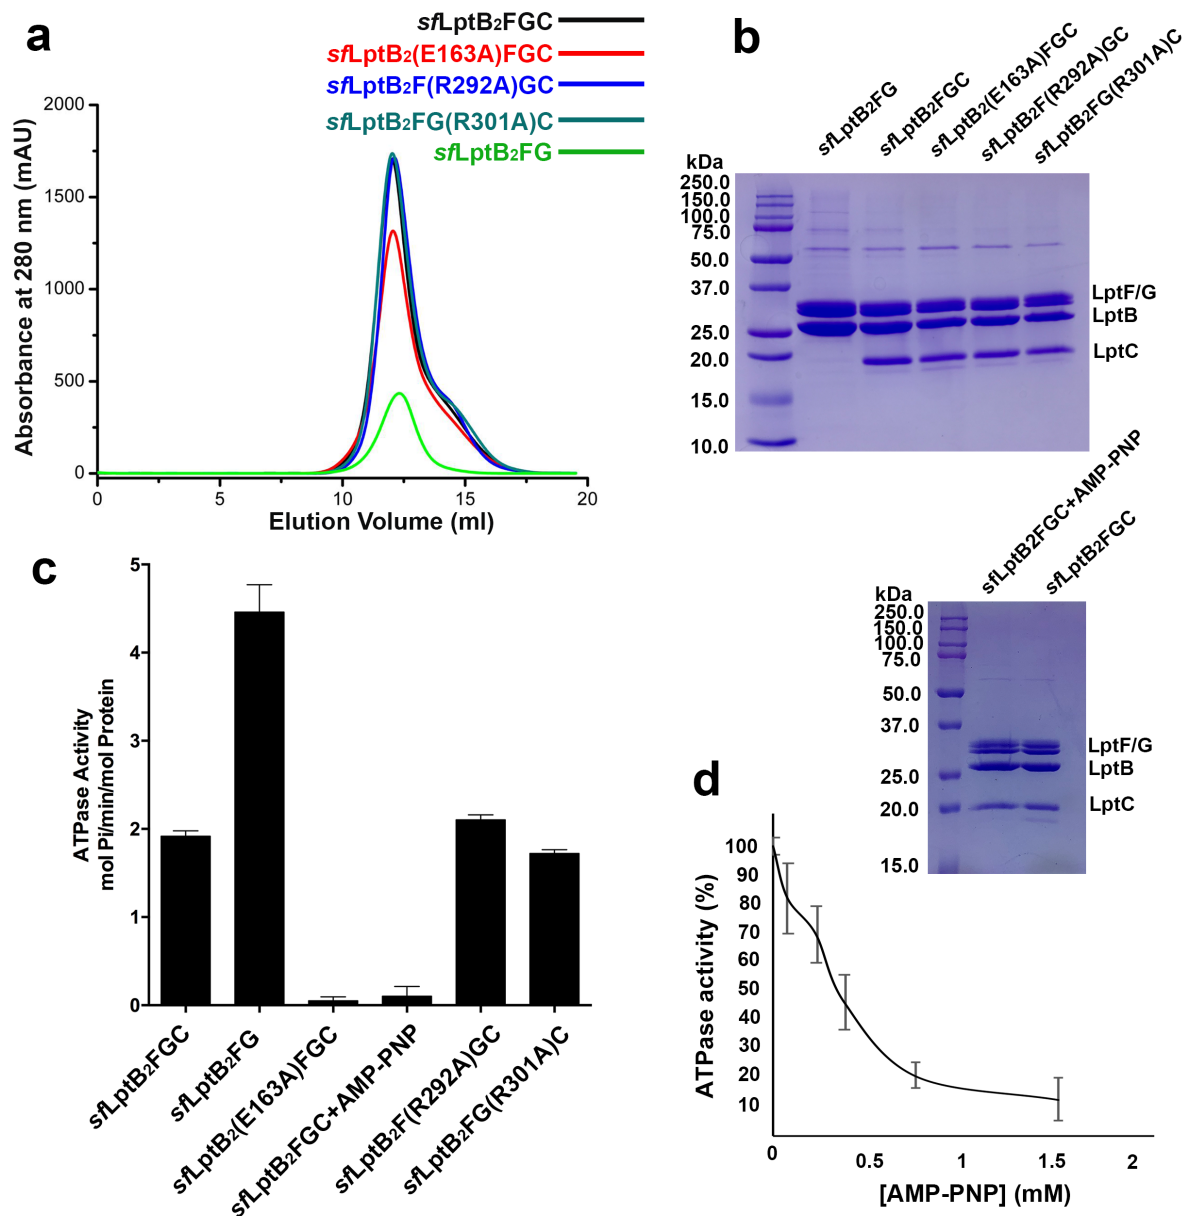

**Supplementary Figure 1. ATPase activity of complexes with or without AMP-PNP.** **a**, The size-exclusion chromatography of purified sfLptB<sub>2</sub>FG, sfLptB<sub>2</sub>FGC, sfLptB<sub>2</sub>(E163A)FGC, sfLptB<sub>2</sub>F(R292A)GC and sfLptB<sub>2</sub>FG(R301A)C. **b**, Coomassie brilliant blue staining of purified sfLptB<sub>2</sub>FG, sfLptB<sub>2</sub>FGC, sfLptB<sub>2</sub>(E163A)FGC, sfLptB<sub>2</sub>F(R292A)GC and sfLptB<sub>2</sub>FG(R301A)C. The purified sfLptB<sub>2</sub>FGC was incubated with AMP-PNP for 1 hour at room temperature, then the mixture was purified by a nickel column. After purification of AMP-PNP bound sfLptB<sub>2</sub>FGC, the LptC is detected in complex with LptB<sub>2</sub>FG. Source data are provided as the source data supplementary fig1b. **c**, The relative ATPase activity of sfLptB<sub>2</sub>FGC, sfLptB<sub>2</sub>FG, sfLptB<sub>2</sub>(E163A)FGC, sfLptB<sub>2</sub>FGC with the AMP-PNP, sfLptB<sub>2</sub>F(R292A)GC and sfLptB<sub>2</sub>FG(R301A)C. Source data are provided as the source data supplementary fig1c. **d**, AMP-PNP inhibits the ATPase activity of sfLptB<sub>2</sub>FGC. Each point represents mean ± s.d. ( $n = 3$  biologically independent samples). Source data are provided as the source data supplementary fig1d.

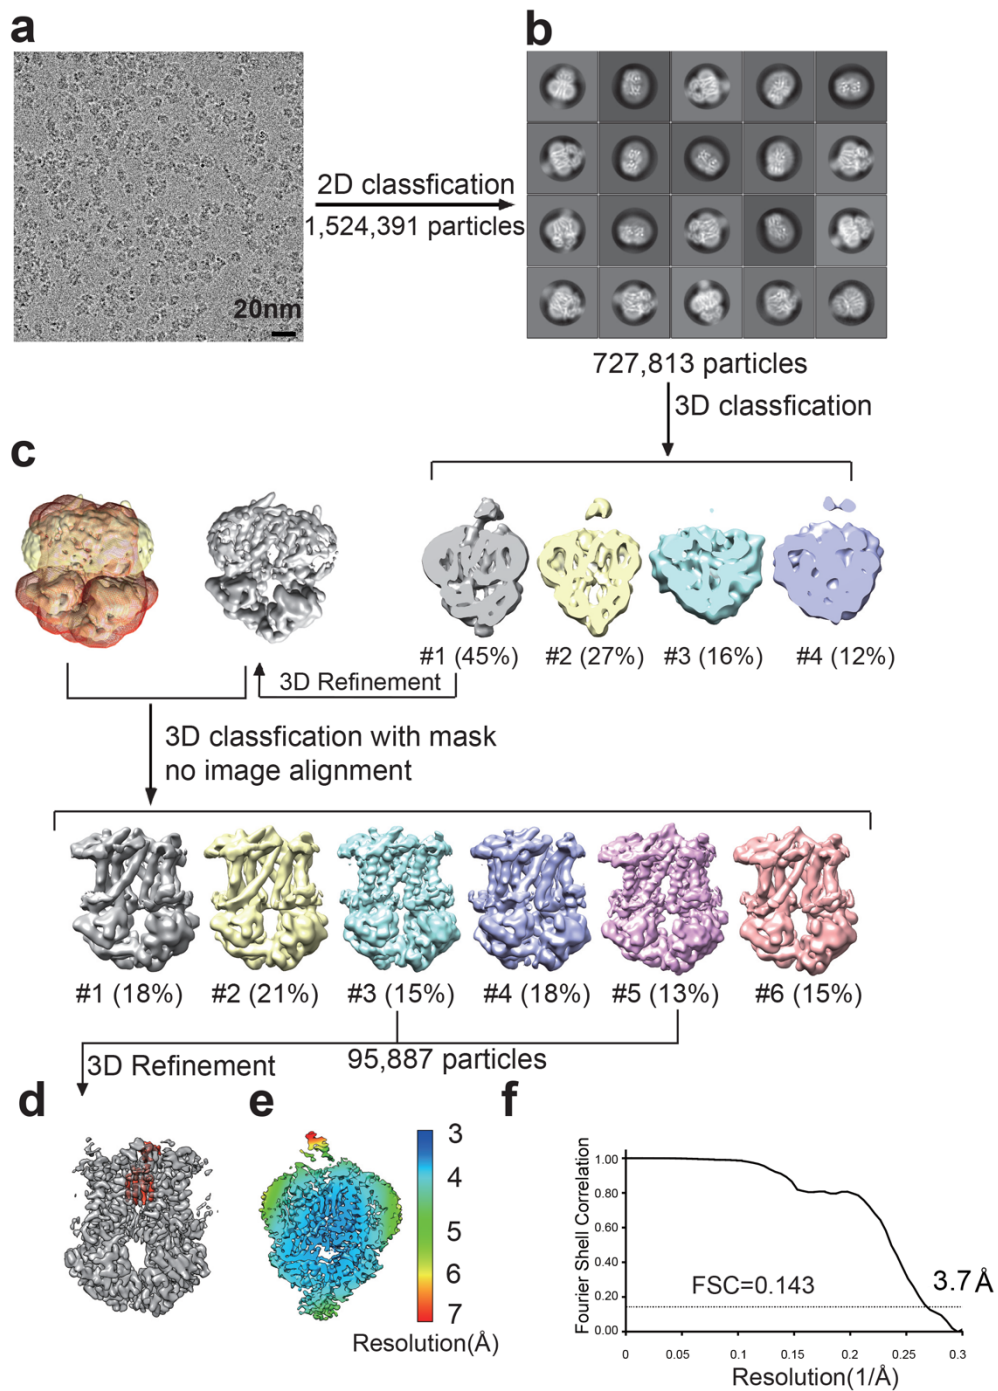

**Supplementary Figure 2. Flowchart for cryo-EM single-particle data processing of LPS bound *sfLptB*<sub>2</sub>FG.** **a**, A micrograph of the single particles after drift correction and dose-weighting. **b**, 2D classifications. **c**, 3D classification and selections. **d**, 3D refinement. cryo-EM density for LPS is coloured in red. **e**, The overall EM maps of the *sfLptB*<sub>2</sub>FG bound LPS complex are colour coded to indicate the range of resolutions. **f**, Gold-standard FSC curves of the final EM maps.

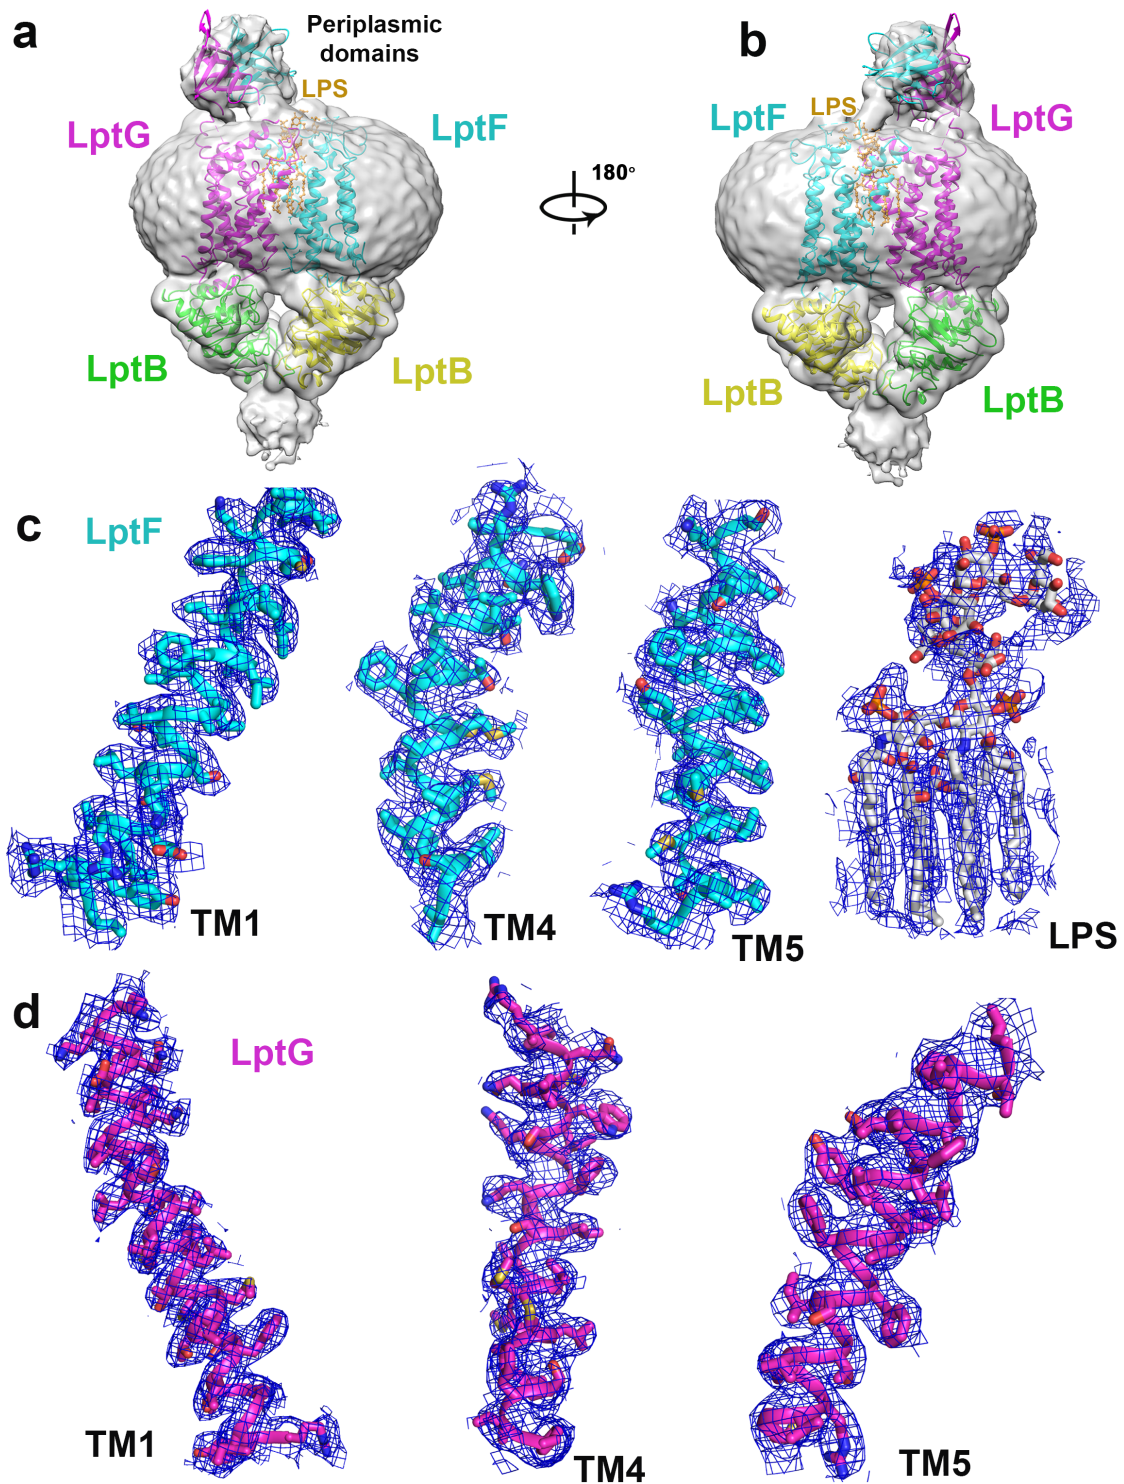

**Supplementary Figure 3. Atomic model of *sfLptB*<sub>2</sub>*FG* bound LPS fits to its cryo-EM map densities.** **a**, Side view of cryo-EM map of LPS (coloured in orange) bound *sfLptB*<sub>2</sub>*FG* with atomic model, showing lipid bilayer and periplasmic domains. **b**, Rotation of 180° along the y-axis relative to the left panel. **c**, Residue side chains of TM1, TM4 and TM5 of LptF are shown in the cryo-EM map densities. LPS is fitted in the map density. **d**, Residue side chains of TM1, TM4 and TM5 of LptG are fitted in the map densities.

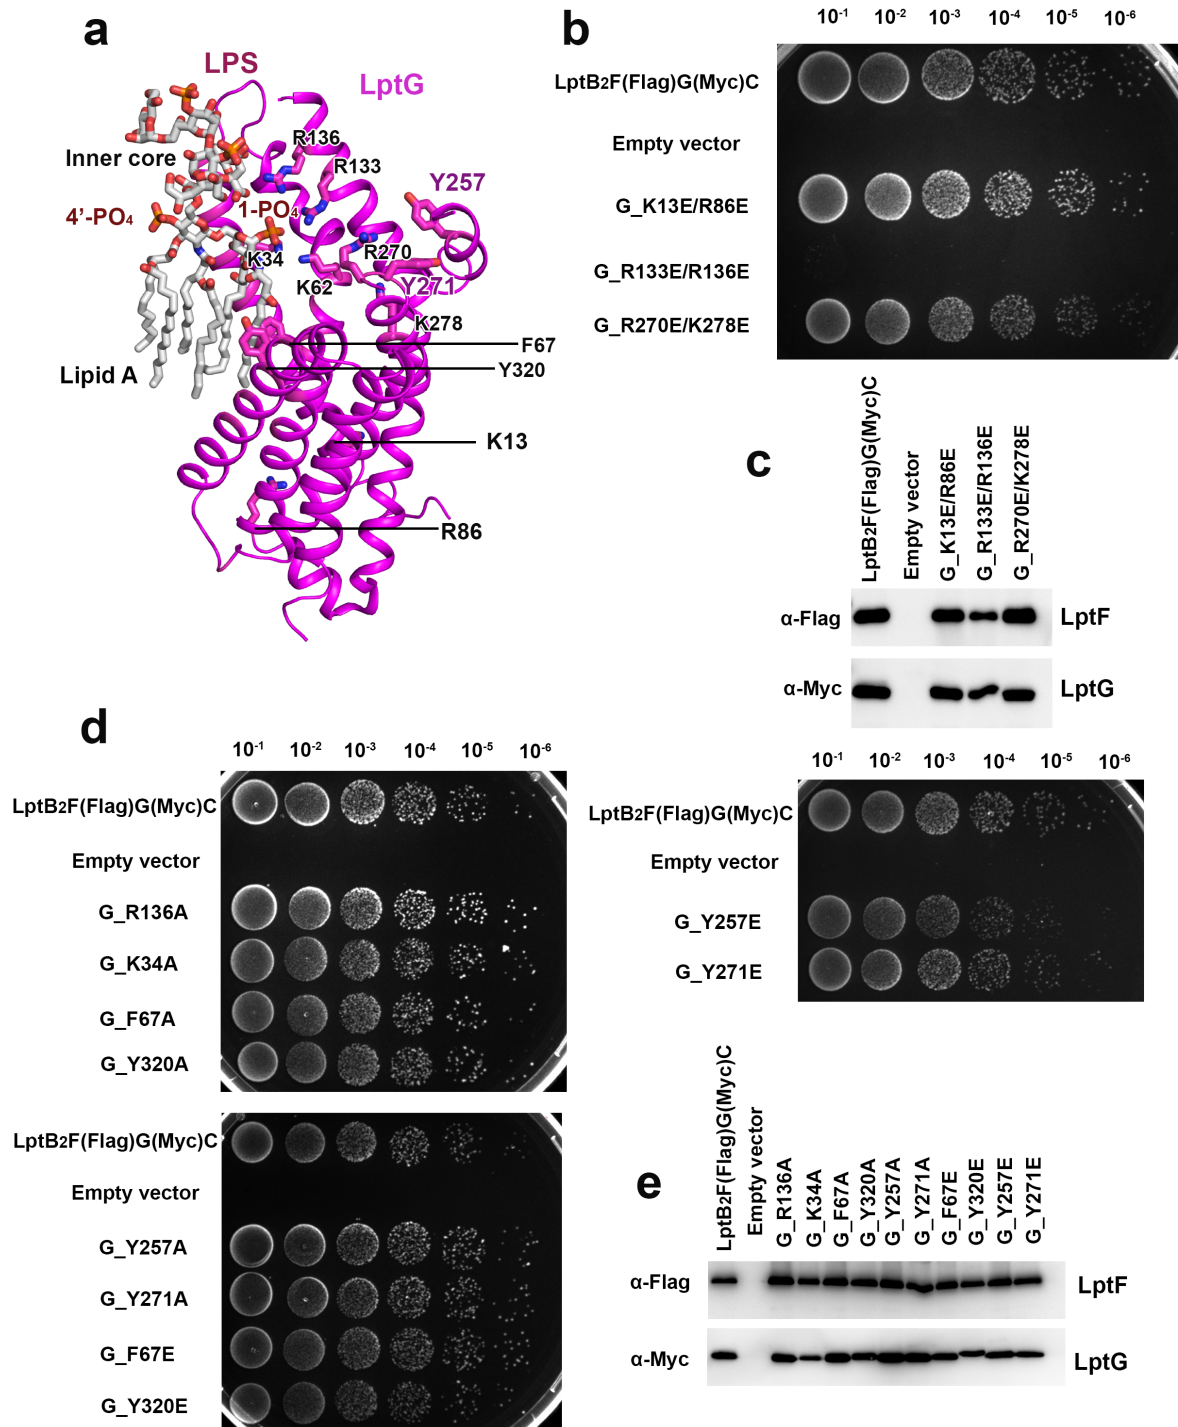

**Supplementary Figure 4. Functional assays of LptG residues.** **a**, Residues of LptG and LPS. **b**, Functional assays of LptG mutants. The double mutants K13E/R86E and R270E/K278E has no impact on cell growth. The mutant R133E/R136E caused the cell death. **c**, Protein expression level of LptG mutants was detected by Western blotting. Source data are provided as the source data supplementary fig4c. **d**, Functional assay of single mutants on LptG residues. The mutants of Y257E and Y271E reduces cell growth. **e**, Protein expression level of LptG mutants was detected by Western blotting. Source data are provided as the source data supplementary fig4e.

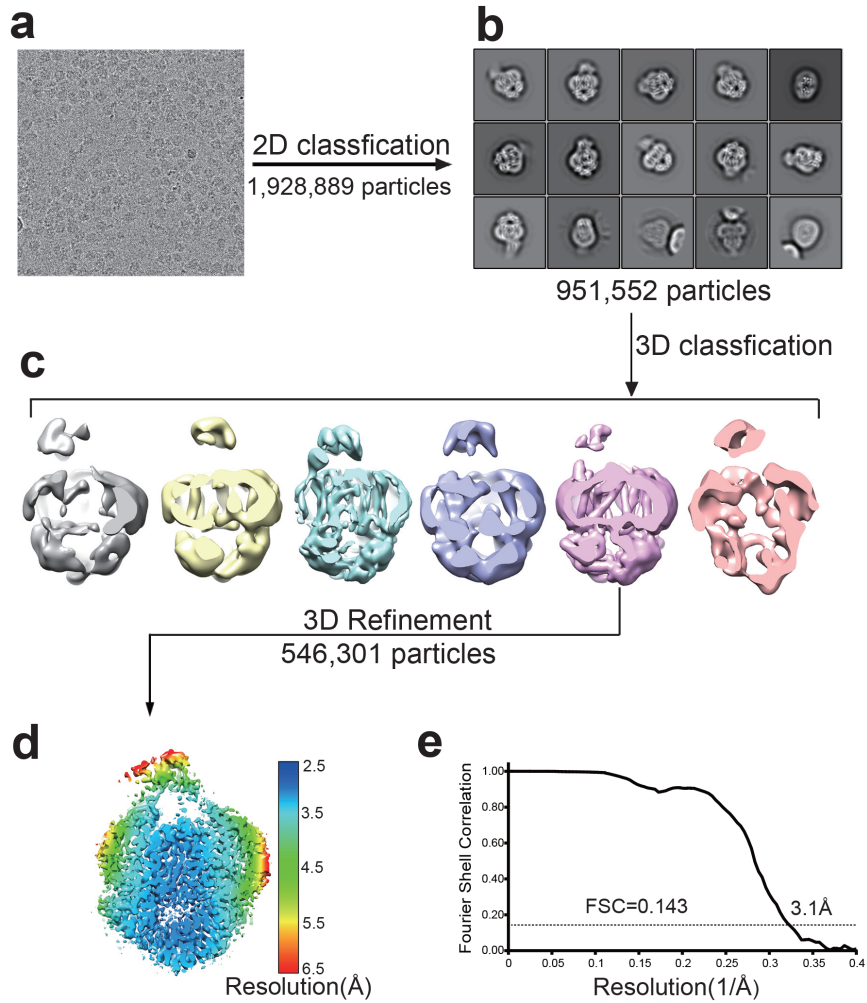

**Supplementary Figure 5. Flowchart for cryo-EM single-particle data processing of LPS-bound *sfLptB*<sub>2</sub>FGC.** **a**, A micrograph of single-particles of *sfLptB*<sub>2</sub>FGC bound LPS. **b**, 2D classification. **c**, 3D classification, **d**, The overall EM maps of the *sfLptB*<sub>2</sub>FGC bound LPS complex are colour coded to indicate the range of resolutions. **e**, Gold-standard FSC curves of the final EM maps.

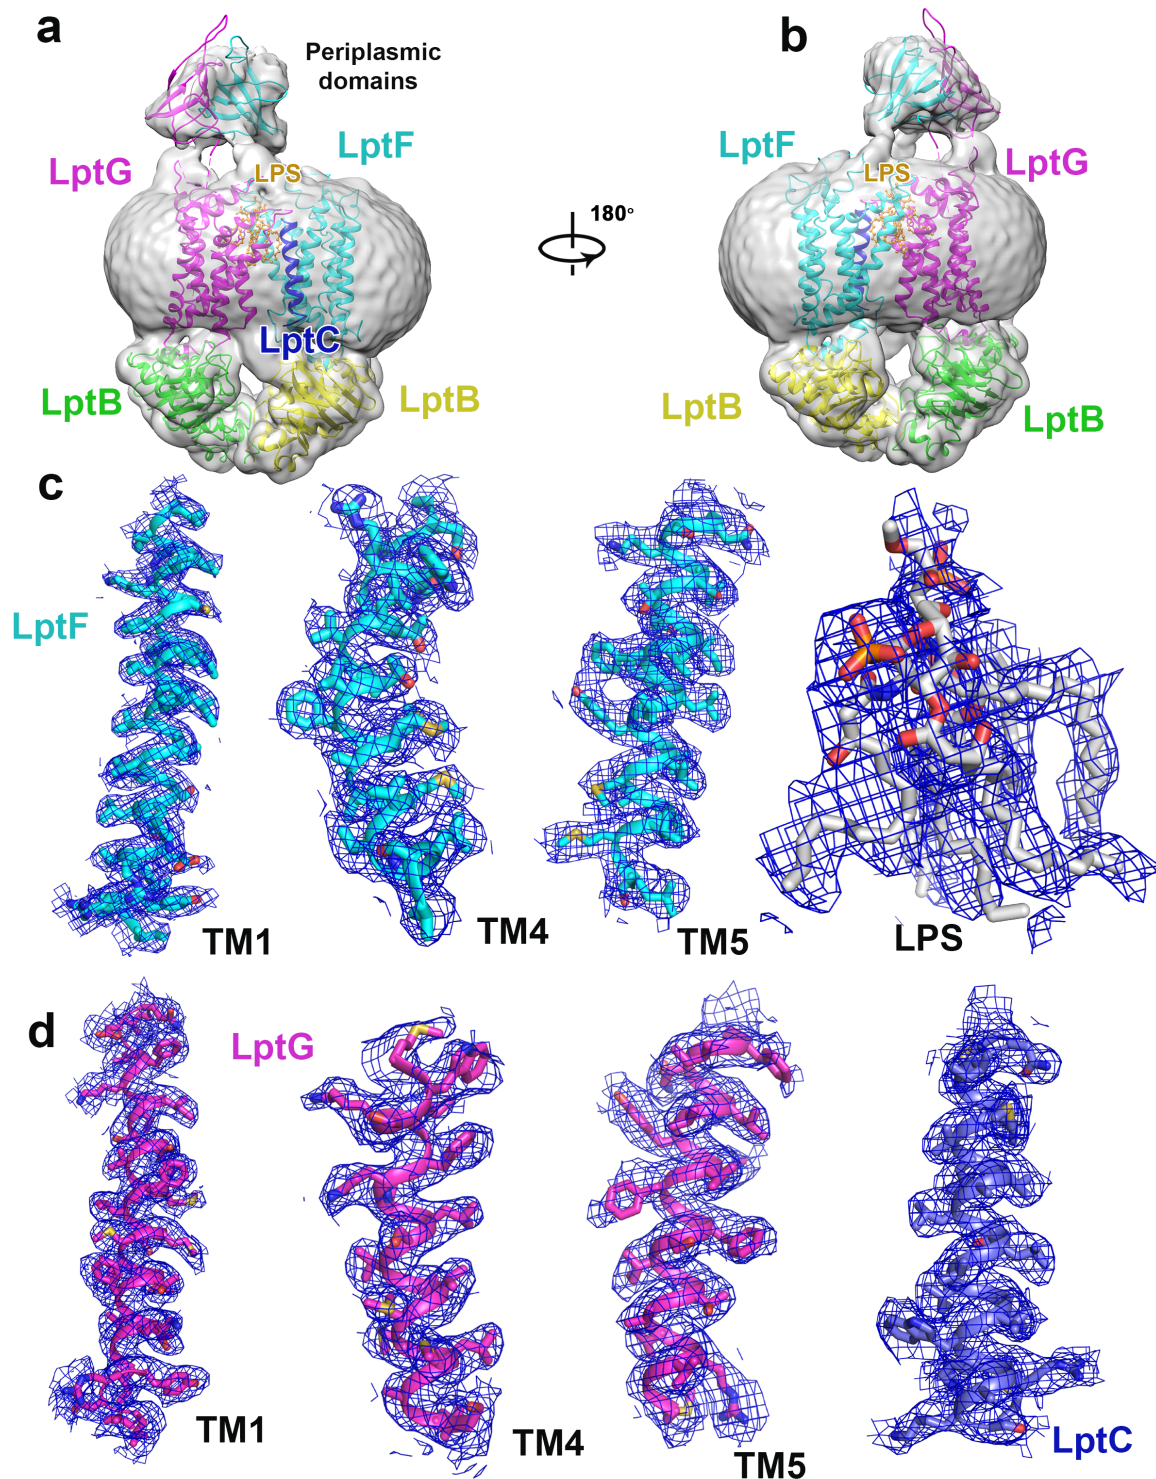

**Supplementary Figure 6. Atomic model of *sfLptB<sub>2</sub>FGC* bound LPS fits to its cryo-EM map densities.** **a**, Side view of cryo-EM map of LPS (coloured in orange) bound *sfLptB<sub>2</sub>FGC* with atomic model, showing lipid bilayer and periplasmic domains. **b**, Rotation of 180° along the y-axis relative to the left panel. **c**, Residue side chains of TM1, TM4 and TM5 of LptF are shown in the cryo-EM map densities. LPS is fitted in the map density. **d**, Residue side chains of TM1, TM4 and TM5 of LptG and LptC are fitted in the map densities.

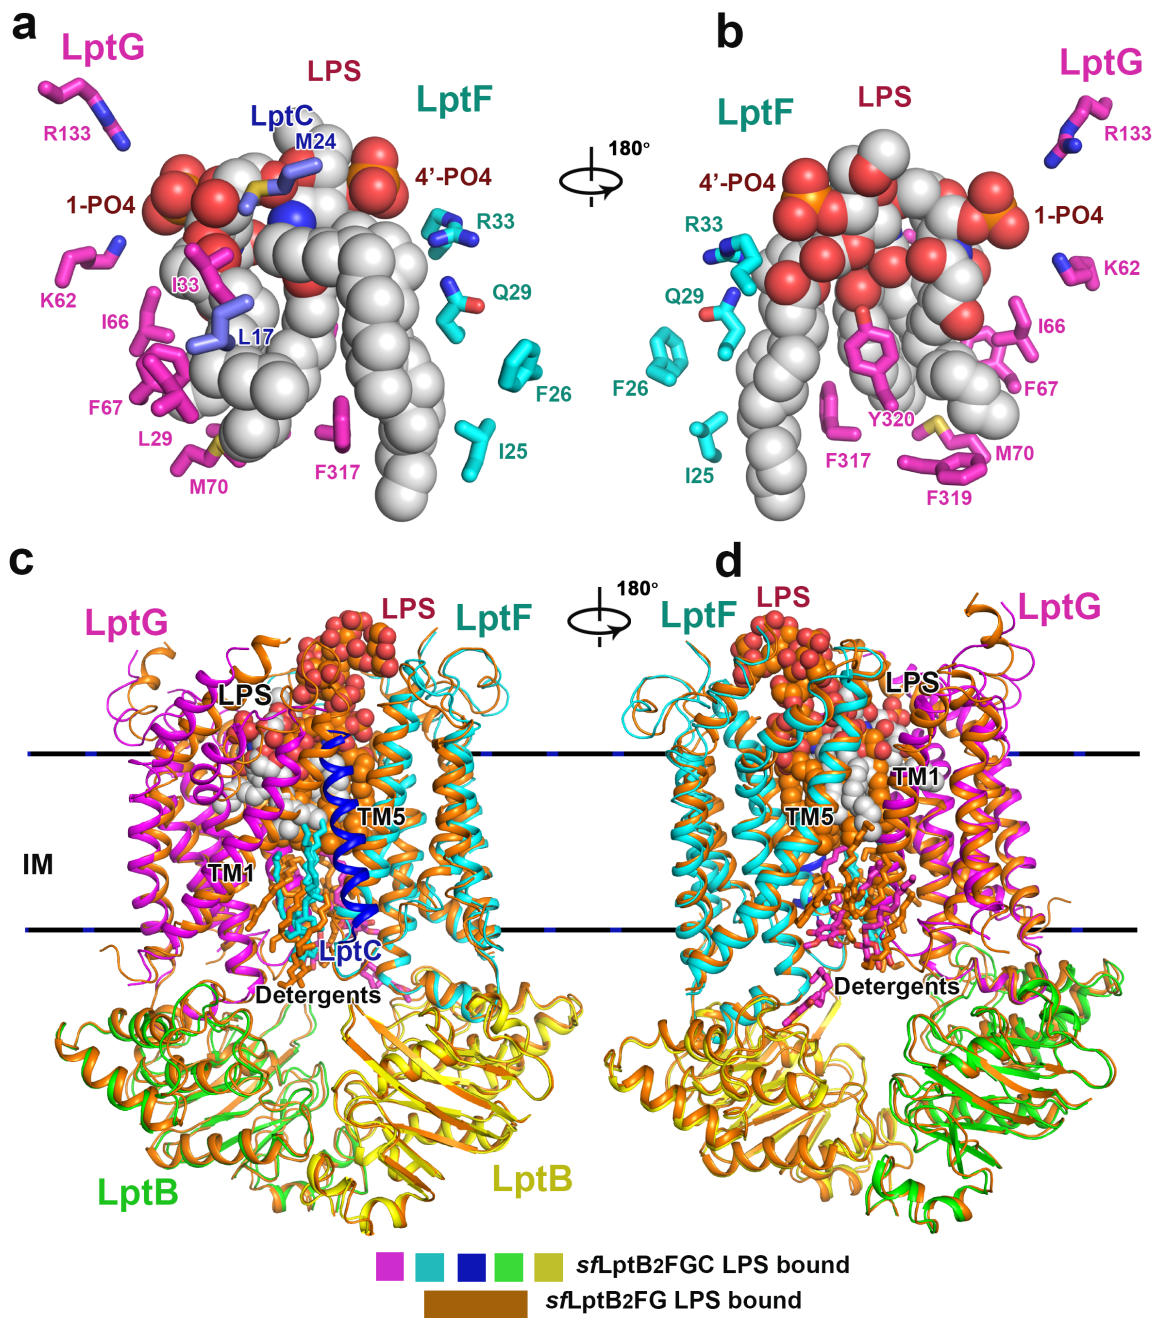

**Supplementary Figure 7. LPS is more flexible in *sfLptB<sub>2</sub>FGC*.** The colour scheme for *sfLptB<sub>2</sub>FGC* is the same as Fig 3. **a**, Residues of *sfLptB<sub>2</sub>FGC* interact with LPS. **b**, 180 degrees rotation along y-axis of the left panel figure. **c**, Superimposition of *sfLptB<sub>2</sub>FGC* and *sfLptB<sub>2</sub>FG*. *sfLptB<sub>2</sub>FG* is coloured in orange. The carbon atoms of LPS from *sfLptB<sub>2</sub>FGC* are coloured in grey, while that of the LPS from *sfLptB<sub>2</sub>FG* are coloured in orange. **d**, 180 degrees rotation along y-axis of the left panel figure.



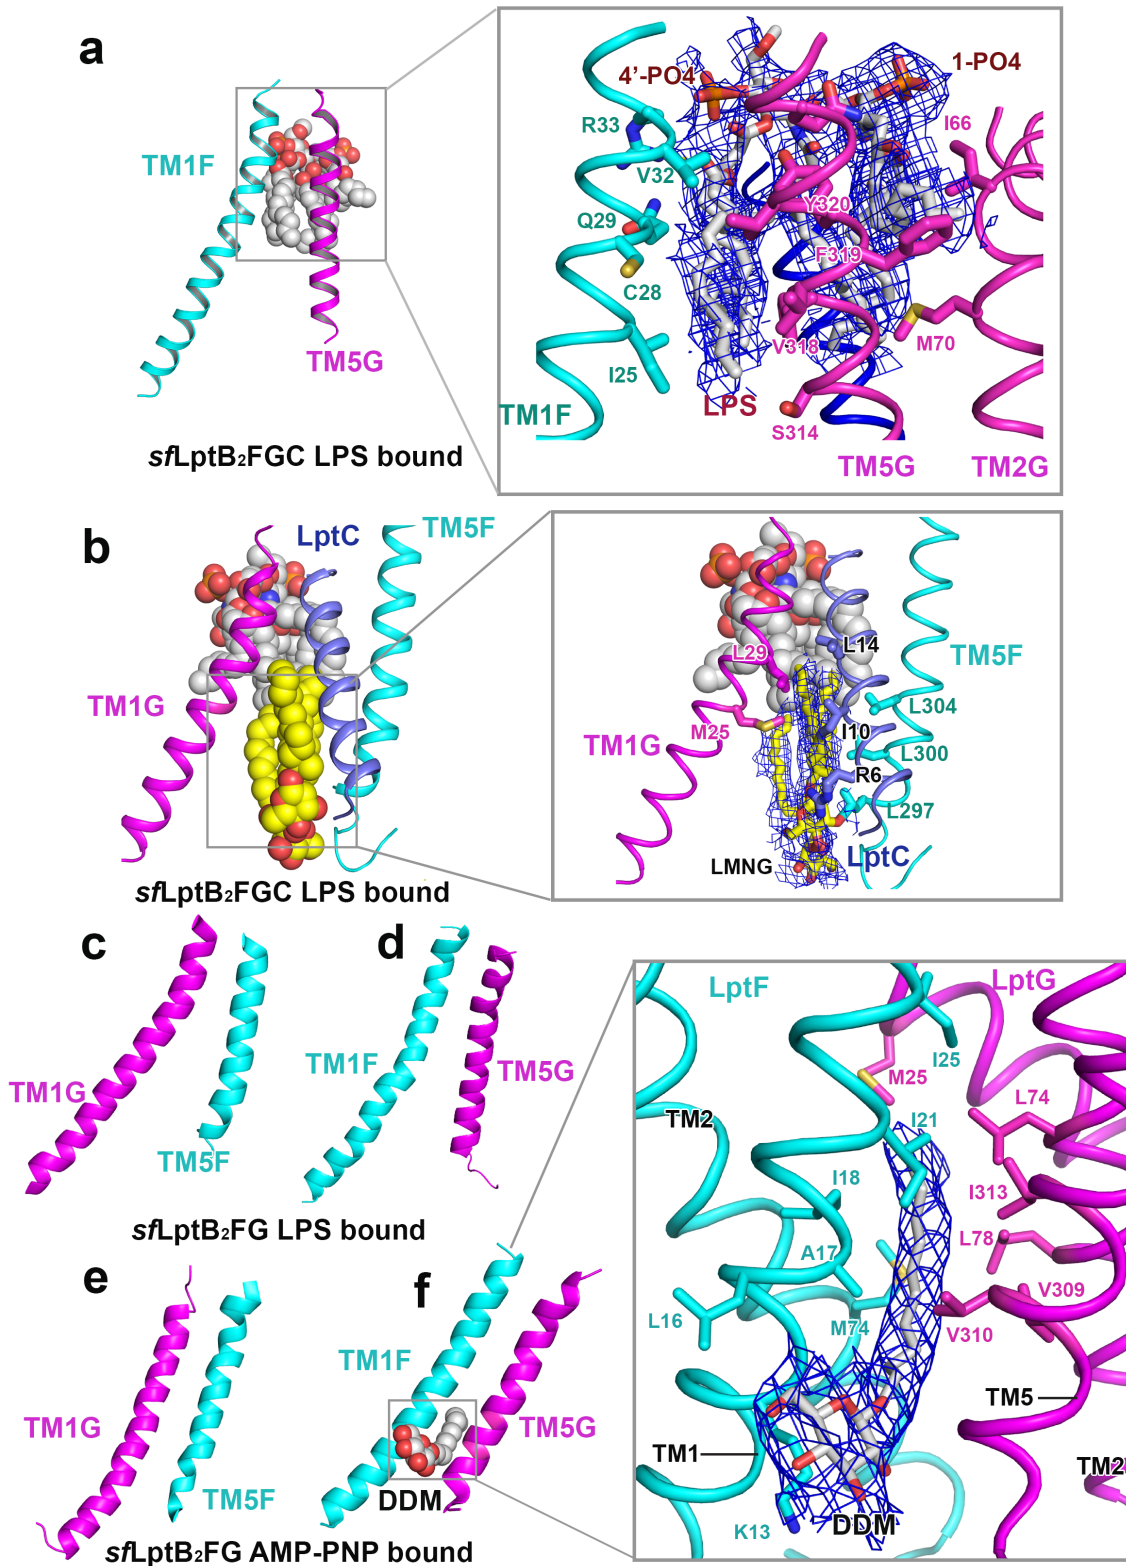

**Supplementary Figure 8. Lateral gates of the structures reveal trapped detergent molecules.** **a**, Lateral gates from *sfLptB<sub>2</sub>FGC* LPS bound. The lateral gates TM1F/TM5G open widely. An acyl tail of LPS is trapped at lateral gate TM1F/TM5G, and a close view of density of LPS. **b**, A LMNG molecule is trapped at the lateral gate TM1G/TM5F from *sfLptB<sub>2</sub>FGC* LPS bound. a close view of density of LMNG. **c**, **d**: Lateral gates from *sfLptB<sub>2</sub>FG* bound LPS complex. The gates have

separation at the bottom. **e**, Lateral gates from *sfLptB<sub>2</sub>FGC* AMP-PNP bound. The lateral gates are closed. **f**, A DDM molecule is trapped at the lateral gate TM1F/TM5G from *sfLptB<sub>2</sub>FGC* AMP-PNP bound. a close view of the density of DDM.

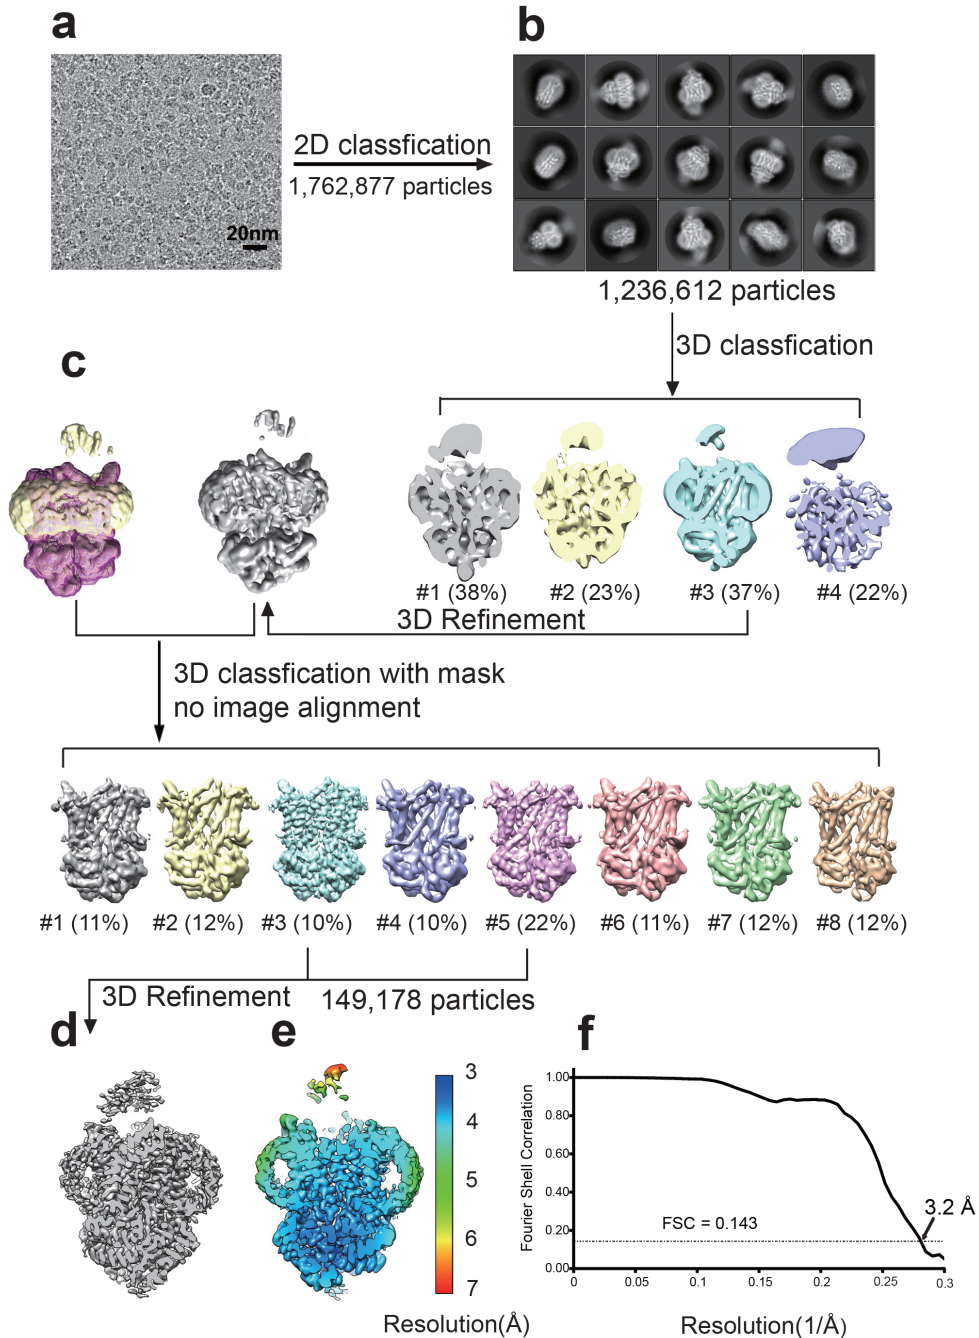

**Supplementary Figure 9. Flowchart for cryo-EM single-particle data processing of AMP-PNP bound *sfLptB<sub>2</sub>FGC*.** **a**, A micrograph of the single particles after drift correction and dose-weighting. **b**, 2D classifications. **c**, 3D classification and selections. **d**, 3D refinement. **e**, The overall EM maps of the *sfLptB<sub>2</sub>FGC* AMP-PNP bound are colour coded to indicate the range of resolutions. **f**, The gold-standard FSC curve of the final EM maps.

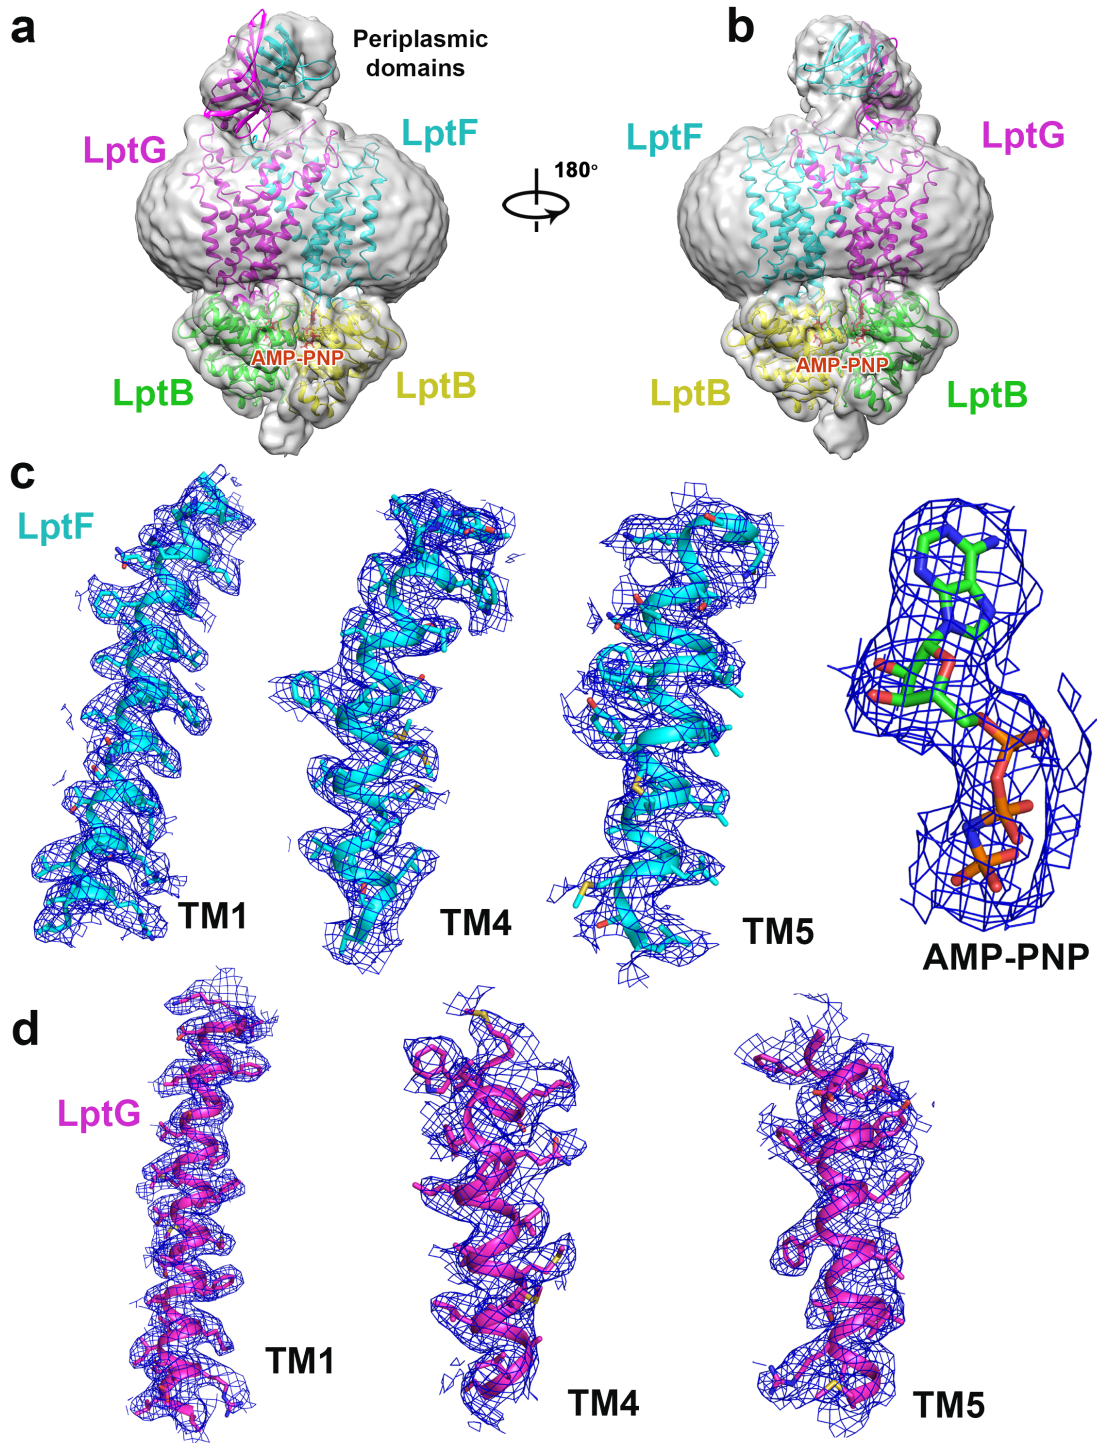

**Supplementary Figure 10. Atomic model of *sfLptB<sub>2</sub>FGC* AMP-PNP bound complex fits to its cryo-EM densities.** **a**, Side view of cryo-EM map of AMP-PNP (coloured in red) bound *sfLptB<sub>2</sub>FGC* with atomic model, showing lipid bilayer and periplasmic domains. **b**, Rotation of 180° along the y-axis relative to the left panel. **c**, Residue side chains of TM1, TM4 and TM5 of LptF are shown in the cryo-EM densities. AMP-PNP is fitted in the density. **d**, Residue side chains of TM1, TM4 and TM5 of LptG are fitted in the densities.

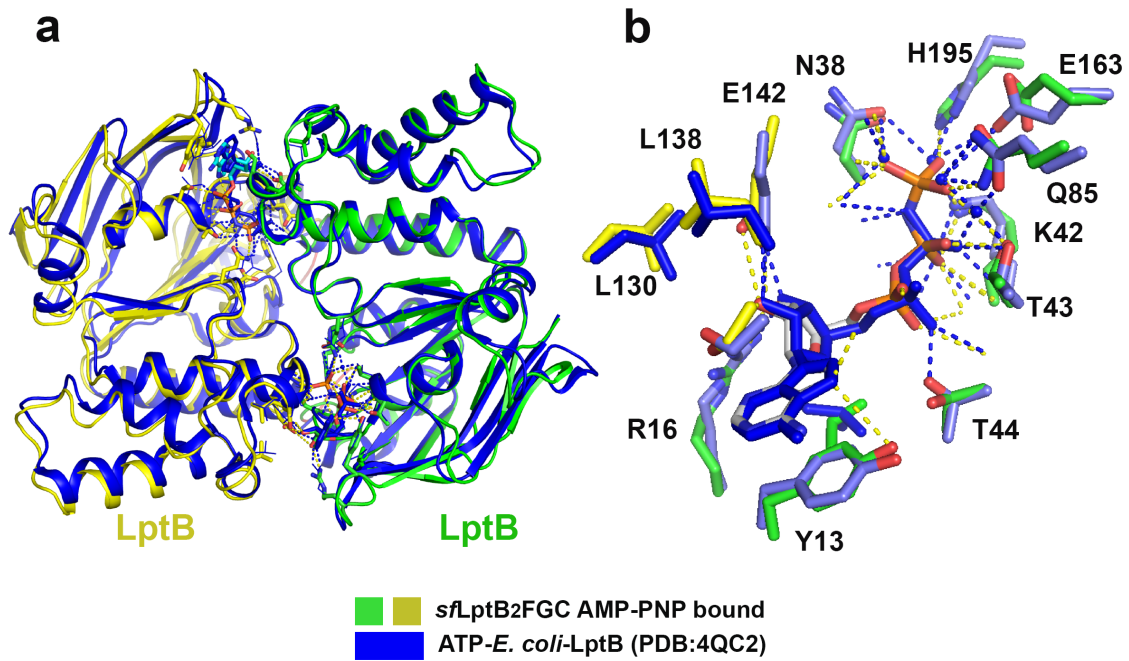

**Supplementary Figure 11. AMP-PNP binds to the active site of LptB. a.** Superimposition of AMP-PNP bound NBDs of *sfLptB<sub>2</sub>FG* with ATP bound *E. coli* LptB (PDB:4QC2). The colour scheme of LptB dimer from *sfLptB<sub>2</sub>FGC* AMP-PNP bound is the same as Fig 1. ATP bound *E. coli* LptB is coloured blue. AMP-PNP is located at the identical position to that of ATP. The side chains of the binding residues of AMP-PNP are at the similar conformations to that of ATP. **b**, Superimposition of binding residues of ATP with AMP-PNP. The AMP-PNP binding residues are at the identical positions to that of ATP.

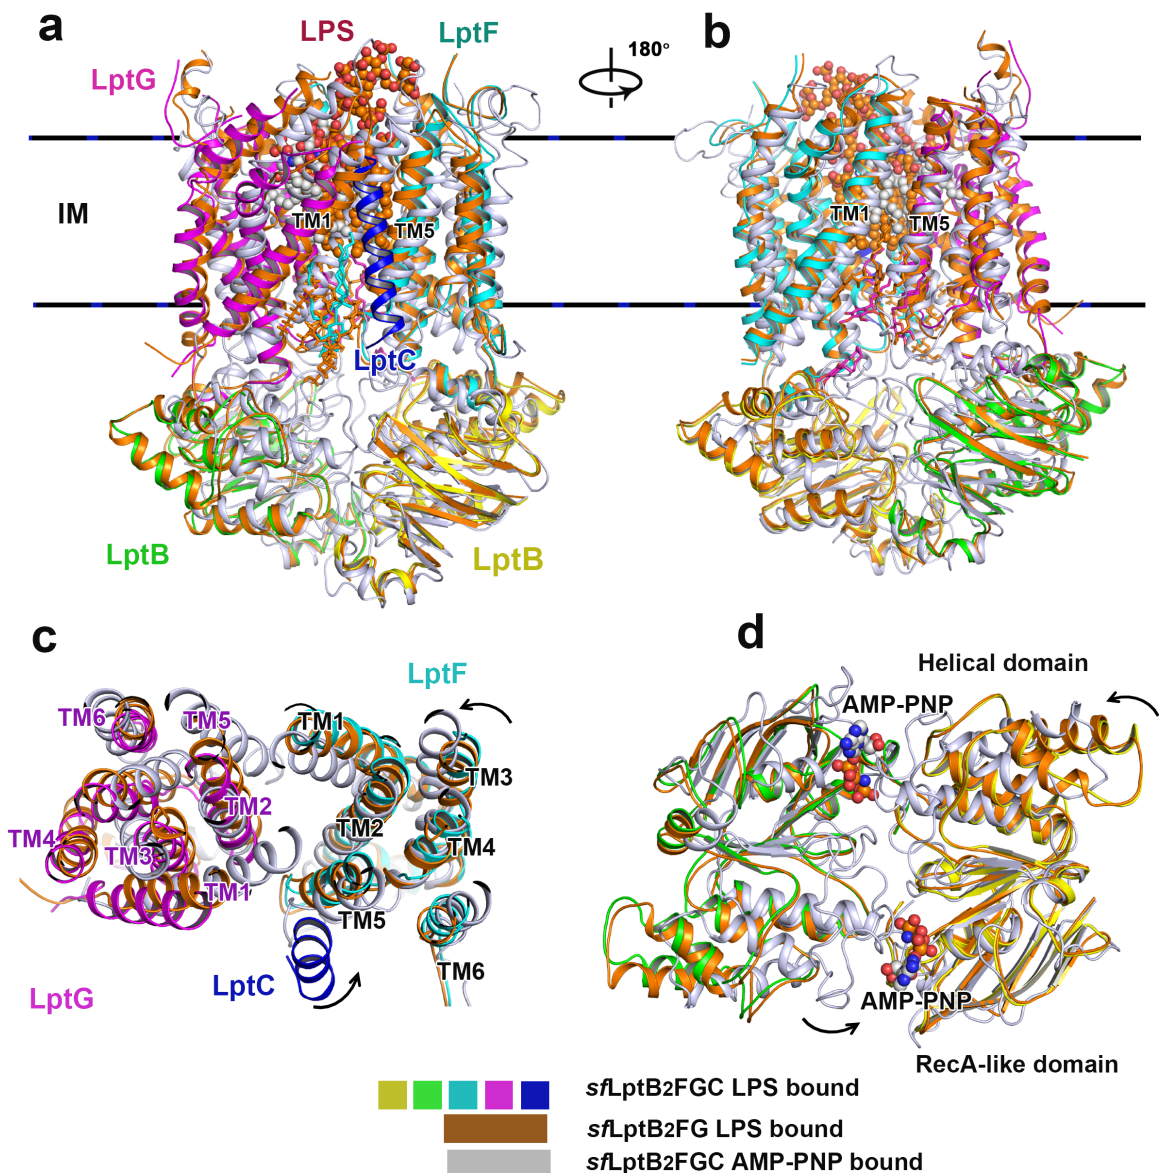

**Supplementary Figure 12. Superimposition of the three Cryo-EM structures.** **a**, Superimposition of *sfLptB<sub>2</sub>FGC* AMP-PNP bound complex to *sfLptB<sub>2</sub>FGC* LPS bound complex. Significant conformational changes are observed in the NBDs and TMDs. This side view shows the lateral gate TM1G/TM5F. *sfLptB<sub>2</sub>FGC* LPS bound complex and *sfLptB<sub>2</sub>FGC* LPS bound complex are in an opened channel conformation, where the channel is open to both periplasm and cytoplasm for LPS binding. *sfLptB<sub>2</sub>FGC* bound AMP-PNP is in a closed channel conformation, where the channel is closed. The colour scheme for *sfLptB<sub>2</sub>FGC* LPS bound complex is the same as Fig 3, while *sfLptB<sub>2</sub>FGC* LPS bound complex is in orange, and *sfLptB<sub>2</sub>FGC* AMP-PNP bound complex is coloured in grey. **b**, 180 degrees rotation along y-axis of the left panel figure. This side view shows the lateral gate TM1F/TM5G. **c**, Conformational changes of the channel from the open to closed state. The TM helices are rotated at the anti-clock rotation to close the channel from *sfLptB<sub>2</sub>FGC*(C) LPS

bound complex to *sfLptB*<sub>2</sub>FGC AMP-PNP bound complex. **d**, The conformational changes of the dimeric LptB are induced by AMP-PNP.

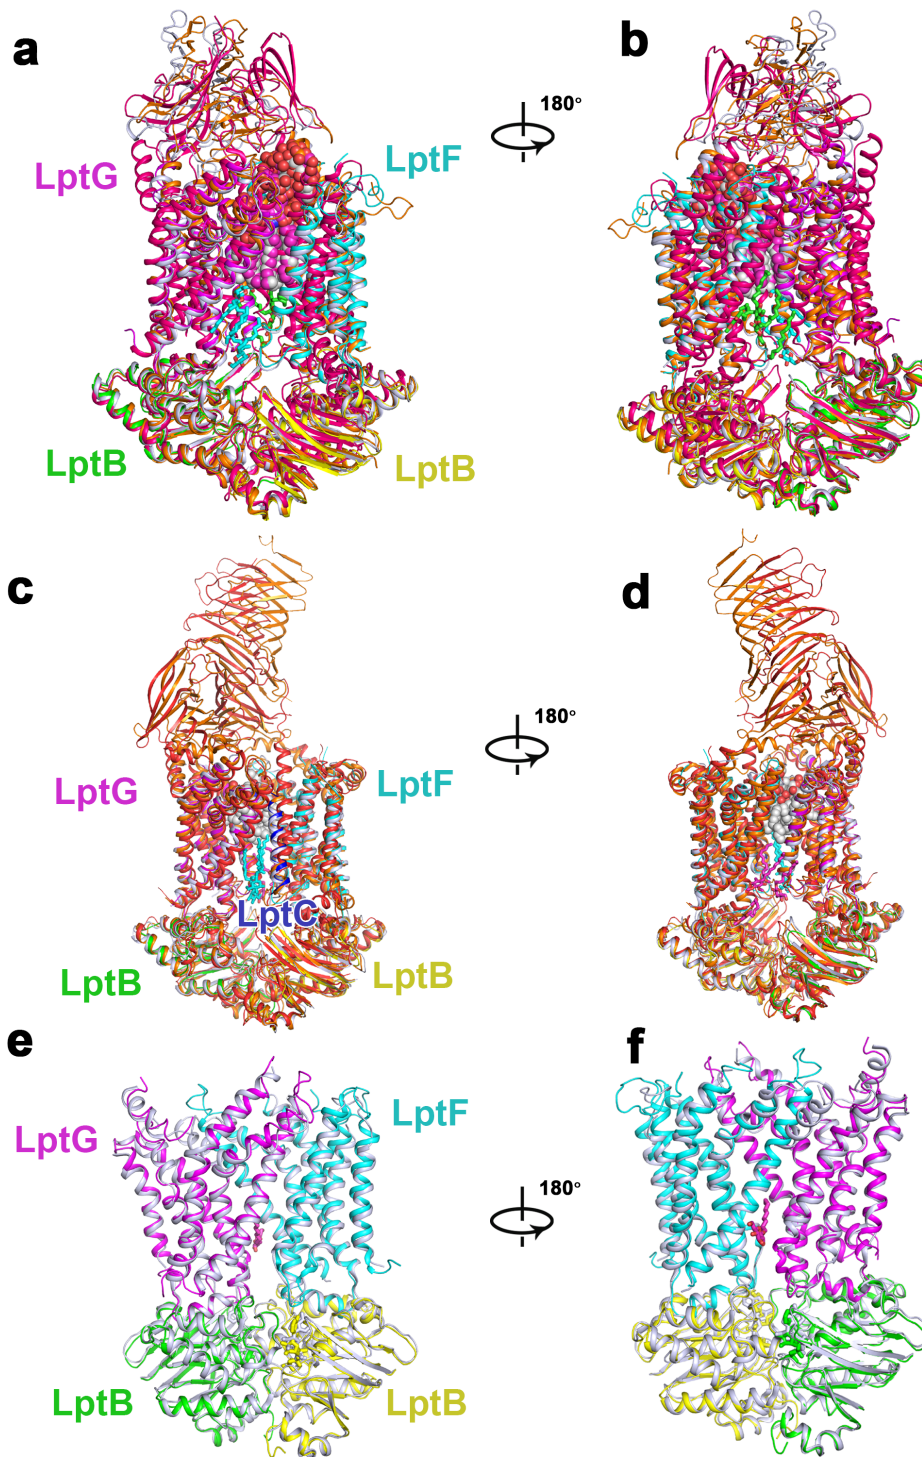

**Supplementary Figure 13. Periplasmic domains of LptF and LptG are flexible.** a. Superimpositions of LPS-bound *s*LptB<sub>2</sub>FG (coloured same as in fig. 1) to LptB<sub>2</sub>FG from *Klebsiella pneumoniae* (PDB code:5L75, orange), LptB<sub>2</sub>FG from *Pseudomonas aeruginosa* (PDB code:5X5Y, pink), and LptB<sub>2</sub>FG from *E. coli* (PDB code:6MHU, blue white). The cryo-EM structure of *s*LptB<sub>2</sub>FG is similar to the crystal structures of *Klebsiella pneumoniae* LptB<sub>2</sub>FG, *Pseudomonas aeruginosa* LptB<sub>2</sub>FG and cryo-EM structure of *E. coli* LptB<sub>2</sub>FG-LPS with RMSD of 1.108 Å over 877 aligned residues, 2.402 Å over 733 aligned residues, and 1.12 Å over 844 aligned residues, respectively.



The periplasmic domains of LptF and LptG are at different conformations, suggesting that the periplasmic domains of LptF and LptG are flexible during LPS transport. **b**, Rotation of 180° along the y-axis relative to the left panel. **c**, Superimpositions of LPS bound *sf*LptB<sub>2</sub>FGC (coloured same as in fig. 3) to LptB<sub>2</sub>FGC from *Enterobacter cloacae* (PDB code:6MIT, orange), LptB<sub>2</sub>FGC from *Vibrio cholerae* (PDB code:6MJP, red) and LptB<sub>2</sub>FGC from *E. coli* (PDB code:6MI7, Blue and white). The cryo-EM structure of *sf*LptB<sub>2</sub>FGC-LPS bound resembles to the crystal structure of *Enterobacter cloacae* and *Vibrio cholerae* and the cryo-EM structure of *E. coli* LptB<sub>2</sub>FGC with RMSD of 1.3446 Å over 825 aligned residues, 2.169 Å over 824 aligned residues and 1.1328 Å over 891 aligned residues, respectively. **d**, Rotation of 180° along the y-axis relative to the left panel. **e**, Superimposition of *sf*LptB<sub>2</sub>FGC AMP-PNP bound complex and *E. coli* LptB<sub>2</sub>FG ADP-vanadate bound complex (PDB code:6MI8, Bluewhite). The overall structures of the two complexes are similar with a RMSD of 1.334 Å over 844 aligned Ca atoms. **f**, Rotation of 180° along the y-axis relative to the left panel.

**Supplementary Table 1. Data collection and model statistics.**

|                                           | <i>sfLptB<sub>2</sub>FG</i> LPS | <i>sfLptB<sub>2</sub>FGC</i><br>AMP-PNP | <i>sfLptB<sub>2</sub>FGC</i> LPS |
|-------------------------------------------|---------------------------------|-----------------------------------------|----------------------------------|
| <b>Data Collection</b>                    |                                 |                                         |                                  |
| EM equipment                              |                                 | Titan Krios (Thermo Fisher)             |                                  |
| Magnification                             |                                 | 49310                                   |                                  |
| Voltage (kV)                              |                                 | 300                                     |                                  |
| Detector                                  |                                 | Gatan K2 Summit                         |                                  |
| Pixel size (Å)                            |                                 | 1.014                                   |                                  |
| Electron dose (e-/Å <sup>2</sup> )        |                                 | 56                                      |                                  |
| Defocus range (µm)                        |                                 | -1.0 ~ -3.0                             |                                  |
| <b>Reconstruction</b>                     |                                 |                                         |                                  |
| Software                                  |                                 | RELION 3.0                              |                                  |
| Number of used particles                  | 95,887                          | 149,178                                 | 546,301                          |
| Symmetry C1 Final Resolution (Å)          | 3.7                             | 3.5                                     | 3.1                              |
| Map sharpening B-factor (Å <sup>2</sup> ) | -104                            | -132                                    | -136                             |
| <b>Refinement</b>                         |                                 |                                         |                                  |
| Software                                  | Phenix                          | Phenix                                  | Phenix                           |
| Model composition                         |                                 |                                         |                                  |
| Protein residues                          | 959                             | 957                                     | 957                              |
| Side chains assigned                      | 959                             | 957                                     | 957                              |
| AMP-PNP                                   | 0                               | 2                                       | 0                                |
| Detergents                                | 6                               | 2                                       | 8                                |
| LPS                                       | 1                               | 0                                       | 1                                |
| <b>R.m.s deviations</b>                   |                                 |                                         |                                  |
| Bonds length (Å)                          | 0.007                           | 0.009                                   | 0.012                            |
| Bonds Angle (°)                           | 1.667                           | 1.206                                   | 1.761                            |
| <b>Ramachandran plot statistics</b>       |                                 |                                         |                                  |
| Preferred (%)                             | 89.84                           | 85.15                                   | 91.07                            |
| Allowed (%)                               | 9.95                            | 14.74                                   | 8.72                             |
| Outlier (%)                               | 0.21                            | 0.11                                    | 0.21                             |
| <b>PDB code</b>                           | 6S8H                            | 6S8G                                    | 6S8N                             |
| <b>EM map code</b>                        | EMD-10122                       | EMD-10121                               | EMD-10125                        |

**Supplementary table 2. Primer sequences used in the study.**

|           |                                                     |
|-----------|-----------------------------------------------------|
| G_R133E_F | CAGGGCGAGCAGATGGCGGAAAACCTACCGTGCGCAG               |
| G_R133E_R | TCGCCTGCGCACGGTAGTTTTCCGCCATCTGCTCGC                |
| G_R136E_F | AGCAGATGGCGCGTAACTACGAAGCGCAGGCGAT                  |
| G_R136E_R | CCGTACATCGCCTGCGCTTCGTAGTTACGCGCCAT                 |
| G_K62E_F  | ATACCTTGCTGAGCGTGCCGGAAGATGTGCAGAT                  |
| G_K62E_R  | GGAAGAAGATCTGCACATCTTCCGGCACGCTCA                   |
| G_L26E_F  | CACCATCATGATGACACTGTTTCATGGAGGTGTCGCTGTCGGGCATTAT   |
| G_L26E_R  | ACTTGATAATGCCCGACAGCGACACCTCCATGAACAGTGTGCATCATGAT  |
| G_M70E_F  | GAAAGATGTGCAGATCTTCTTCCCGGAGGCGGCTCTGCTTGGGGCGTT    |
| G_M70E_R  | CAAGCAACGCCCAAGCAGAGCCGCCTCCGGGAAGAAGATCTGCACAT     |
| G_F67E_F  | GAGCGTGCCGAAAGATGTGCAGATCGAGTTCCCGATGGCGGCTCTGC     |
| G_F67E_R  | CCCCAAGCAGAGCCGCCATCGGGAACCTCGATCTGCACATCTTTCGGC    |
| G_Y320E_F | CGGTATCAGTTTCGTTTTGTCTTCGAGGTAAGTACTGGACCAGATCTTCGG |
| G_Y320E_R | GCGGGCCGAAGATCTGGTCCAGTACCTCGAAGACAAAACCGAAACTGA    |
| G_Y257E_F | ACTCTCTATCAGCGTTTTGCACAACGAGGTGAAGTATCTGAAGTGCAGC   |
| G_Y257E_R | GACCGCTCGACTTCAGATACTTCACCTCGTTGTGCAAACCGCTGATAGA   |
| G_Y271E_F | GTCGAGCGGTCAGGATGCCGGACGTGAGCAGCTCAACATGTGGAGCAAA   |
| G_Y271E_R | AAGATTTTGCTCCACATGTTGAGCTGCTCACGTCCGGCATCCTGACCG    |
| G_K34E_F  | GCTGGTGTGCTGTCGGGCATTATCGAGTTTGTGATCAGCTGAAAAA      |
| G_K34E_R  | CCGGCTTTTTTCAGCTGATCGACAACTCGATAATGCCCGACAGCGACA    |
| G_R301A_F | CGTTCATCTTTGGCCCACTGGCGAGCGTACCGA                   |
| G_R301A_R | ACGCCCATCGGTACGCTCGCCAGTGGGCCAAA                    |
| F_R292A_F | CTGAGCGTGGTTAACCCAGCGCAGGGACGCG                     |
| F_R292A_R | CGACAGTACGCGTCCCTGCGCTGGGTTAACAC                    |
| F_D129A_F | GCGTCATCAGGCGGAAGTGTAGCAGAAGCGAAAGCGAACCCCTGG       |
| F_D129A_R | CTAACACTTCCGCCTGATGACGCGATGACCACGGTCCCGCCAC         |
| F_E265A_F | TGCTCGCGCAGCGCTGAACTGGCGTATCACGTTGGTATTCACCGT       |
| F_E265A_R | GCCAGTTCAGCGCTGCGCGAGCACGATCGGTGTCACTGTTCCAC        |
| F_R212E_F | GGGAACGGAATTCGAAGGCACTGCATTGTTACGTGATTTCCG          |
| F_R212E_R | TTCGAATTCGTTCCCTGGTTGAGAGTGACGACCTGGGAG             |
| F_Y230E_F | TTCCAGGATGAACAGGCGATCATTGGTCACCAGGCGGTGGCGCT        |
| F_Y230E_R | ATCGCCTGTTTCATCCTGGAAGTCCGTAATGCGGAAATCACGTAAC      |
| F_P139D_F | GAAAGCGAACGATGGCATGGCGGCGCTGGCGCAAG                 |
| F_P139D_R | TGCCATCGTTCGCTTTTCGCTTCTGCTAACACTTCATCCTGATGACG     |
| F_F149D_F | GCGCAAGGGCAAGATCAGCAAGCGACTAATGGCAGCTCGG            |
| F_F149D_R | TGATCTTGCCCTTGCGCCAGCGCCGCCATGCCAGG                 |
| G_W204D_F | GAAGTTTGACCCGGAACATAAAGTCGACCGTCTGTGCGAGGTTGATGA    |
| G_W204D_R | CAGATTCATCAACCTGCGACAGACGGTCGACTTTATGTTCCGGGTCAA    |
| G_I163D_F | GAAAGATGGCAACAACCTTCGTCTACGACGAGCGGGTTAAAGGTGACGA   |
| G_I163D_R | ACTCTTCGTACCTTTAACCCGCTCGTCGTAGACGAAGTTGTTGCCAT     |
