# Supplementary material for: Cryo-EM structures of lipopolysaccharide transporter LptB2FGC in lipopolysaccharide or AMP-PNP-bound states reveal its transport mechanism
Source: PubMed Central journal article supplement (PMC6744409; doi:10.1038/s41467-019-11977-1), 2019-09-13
Supplement: 41467_2019_11977_MOESM2_ESM.pdf [file 41467_2019_11977_MOESM2_ESM.pdf]

## Description of Additional Supplementary Files

**File name:** Supplementary Movie 1

**Description:** A rotational motion from the *sfLptB<sub>2</sub>FGC* LPS bound structure to the *sfLptB<sub>2</sub>FGC* AMP-PNP bound structure from a side view. A rotational motion from the *sfLptB<sub>2</sub>FGC* LPS bound structure to the *sfLptB<sub>2</sub>FGC* AMP-PNP bound structure and then return to the LPS bound state from the side view of lateral gate TM1G/TM5F. The *sfLptB<sub>2</sub>FGC* LPS bound structure is in the same colour scheme of Fig3, except TM helix of LptC in magenta as LptG. The *sfLptB<sub>2</sub>FGC* AMP-PNP bound structure in orange. The LptB<sub>2</sub>FGC is rotated at counter-clockwise direction to close the channel and push LPS out of the cavity, while the LptB<sub>2</sub>FGC is rotated at clockwise direction to open the channel to extract LPS from the IM.

**File name:** Supplementary Movie 2

**Description:** A rotational motion from the *sfLptB<sub>2</sub>FGC* LPS bound structure to the *sfLptB<sub>2</sub>FGC* AMP-PNP structure from a side view of 180° rotation along y-axis of movie 1. A rotational motion from the *sfLptB<sub>2</sub>FGC* LPS bound structure to the *sfLptB<sub>2</sub>FGC* AMP-PNP structure and then return to the LPS bound state from the side view of lateral gate TM1F/TM5G. The *sfLptB<sub>2</sub>FGC* LPS bound structure is in the same colour scheme as that of Fig3. The *sfLptB<sub>2</sub>FGC* AMP-PNP bound structure in orange. The LptB<sub>2</sub>FGC is rotated at counter-clockwise direction to close the channel and push LPS out of the cavity, while the LptB<sub>2</sub>FGC is rotated at clockwise direction to open the channel to extract LPS from the IM.
