# Supplementary material for: Cryo-EM structures of lipopolysaccharide transporter LptB2FGC in lipopolysaccharide or AMP-PNP-bound states reveal its transport mechanism
Source: PubMed Central journal article supplement (PMC6744409; doi:10.1038/s41467-019-11977-1), 2019-09-13
Supplement: 41467_2019_11977_MOESM5_ESM.pdf [file 41467_2019_11977_MOESM5_ESM.pdf]

## Reporting Summary

Nature Research wishes to improve the reproducibility of the work that we publish. This form provides structure for consistency and transparency in reporting. For further information on Nature Research policies, see [Authors & Referees](#) and the [Editorial Policy Checklist](#).

### Statistics

For all statistical analyses, confirm that the following items are present in the figure legend, table legend, main text, or Methods section.

- | n/a                                 | Confirmed                                                                                                                                                                                                                                                                           |
|-------------------------------------|-------------------------------------------------------------------------------------------------------------------------------------------------------------------------------------------------------------------------------------------------------------------------------------|
| <input type="checkbox"/>            | <input checked="" type="checkbox"/> The exact sample size ( $n$ ) for each experimental group/condition, given as a discrete number and unit of measurement                                                                                                                         |
| <input type="checkbox"/>            | <input checked="" type="checkbox"/> A statement on whether measurements were taken from distinct samples or whether the same sample was measured repeatedly                                                                                                                         |
| <input checked="" type="checkbox"/> | <input type="checkbox"/> The statistical test(s) used AND whether they are one- or two-sided<br><i>Only common tests should be described solely by name; describe more complex techniques in the Methods section.</i>                                                               |
| <input checked="" type="checkbox"/> | <input type="checkbox"/> A description of all covariates tested                                                                                                                                                                                                                     |
| <input checked="" type="checkbox"/> | <input type="checkbox"/> A description of any assumptions or corrections, such as tests of normality and adjustment for multiple comparisons                                                                                                                                        |
| <input checked="" type="checkbox"/> | <input type="checkbox"/> A full description of the statistical parameters including central tendency (e.g. means) or other basic estimates (e.g. regression coefficient) AND variation (e.g. standard deviation) or associated estimates of uncertainty (e.g. confidence intervals) |
| <input checked="" type="checkbox"/> | <input type="checkbox"/> For null hypothesis testing, the test statistic (e.g. $F$ , $t$ , $r$ ) with confidence intervals, effect sizes, degrees of freedom and $P$ value noted<br><i>Give <math>P</math> values as exact values whenever suitable.</i>                            |
| <input checked="" type="checkbox"/> | <input type="checkbox"/> For Bayesian analysis, information on the choice of priors and Markov chain Monte Carlo settings                                                                                                                                                           |
| <input checked="" type="checkbox"/> | <input type="checkbox"/> For hierarchical and complex designs, identification of the appropriate level for tests and full reporting of outcomes                                                                                                                                     |
| <input checked="" type="checkbox"/> | <input type="checkbox"/> Estimates of effect sizes (e.g. Cohen's $d$ , Pearson's $r$ ), indicating how they were calculated                                                                                                                                                         |

*Our web collection on [statistics for biologists](#) contains articles on many of the points above.*

### Software and code

Policy information about [availability of computer code](#)

Data collection The automated data collection program SerialEM (<http://bio3d.colorado.edu/SerialEM/>) was used for cryoEM data collection.

Data analysis All software used for data analysis in this study were available online:

1. MotionCor2 (<http://msg.ucsf.edu/em/software/motioncor2.html>): image stacks correction;
2. Gctf (<http://www.mrc-lmb.cam.ac.uk/kzhang/Gctf/>): ctf estimation;
3. RELION (<http://www2.mrc-lmb.cam.ac.uk/relion>): Cryo-EM data analysis
4. Coot (<https://www2.mrc-lmb.cam.ac.uk/personal/pemsley/coot/>): model building
5. UCSF Chimera (<https://www.cgl.ucsf.edu/chimera/>): Density maps or structural models based visualization, segmentation
6. PyMOL (<https://www.pymol.org/>): Structural figures were prepared with the Pymol software
7. Phenix (<https://www.phenix-online.org>): model refine

For manuscripts utilizing custom algorithms or software that are central to the research but not yet described in published literature, software must be made available to editors/reviewers. We strongly encourage code deposition in a community repository (e.g. GitHub). See the Nature Research [guidelines for submitting code & software](#) for further information.

### Data

Policy information about [availability of data](#)

All manuscripts must include a [data availability statement](#). This statement should provide the following information, where applicable:

- Accession codes, unique identifiers, or web links for publicly available datasets
- A list of figures that have associated raw data
- A description of any restrictions on data availability

The atomic coordinates of sflPtB2FGC-LPS complex, sflPtB2FG-LPS complex, sflPtB2FGC-AMP-PNP complex are deposited at Protein Data Bank under access codes 6S8N, 6S8H, and 6S8G, respectively. Cryo-EM density maps of sflPtB2FGC-LPS complex, sflPtB2FG-LPS complex, sflPtB2FGC-AMP-PNP complex are deposited at Electron Microscopy Data Bank under access numbers EMD-10125, EMD-10122, and EMD-10121, respectively.

## Field-specific reporting

Please select the one below that is the best fit for your research. If you are not sure, read the appropriate sections before making your selection.

Life sciences       Behavioural & social sciences       Ecological, evolutionary & environmental sciences

For a reference copy of the document with all sections, see [nature.com/documents/nr-reporting-summary-flat.pdf](https://www.nature.com/documents/nr-reporting-summary-flat.pdf)

## Life sciences study design

All studies must disclose on these points even when the disclosure is negative.

|                 |                                                                                                      |
|-----------------|------------------------------------------------------------------------------------------------------|
| Sample size     | <input type="text" value="No statistical methods were used to predetermine sample size."/>           |
| Data exclusions | <input type="text" value="No data were excluded from analyses."/>                                    |
| Replication     | <input type="text" value="All attempts at replication were successful."/>                            |
| Randomization   | <input type="text" value="This is not relevant to our study, because no grouping was needed."/>      |
| Blinding        | <input type="text" value="Blinding was not relevant to our study, because no grouping was needed."/> |

## Reporting for specific materials, systems and methods

We require information from authors about some types of materials, experimental systems and methods used in many studies. Here, indicate whether each material, system or method listed is relevant to your study. If you are not sure if a list item applies to your research, read the appropriate section before selecting a response.

### Materials & experimental systems

| n/a                                 | Involvement in the study                             |
|-------------------------------------|------------------------------------------------------|
| <input type="checkbox"/>            | <input checked="" type="checkbox"/> Antibodies       |
| <input checked="" type="checkbox"/> | <input type="checkbox"/> Eukaryotic cell lines       |
| <input checked="" type="checkbox"/> | <input type="checkbox"/> Palaeontology               |
| <input checked="" type="checkbox"/> | <input type="checkbox"/> Animals and other organisms |
| <input checked="" type="checkbox"/> | <input type="checkbox"/> Human research participants |
| <input checked="" type="checkbox"/> | <input type="checkbox"/> Clinical data               |

### Methods

| n/a                                 | Involvement in the study                        |
|-------------------------------------|-------------------------------------------------|
| <input checked="" type="checkbox"/> | <input type="checkbox"/> ChIP-seq               |
| <input checked="" type="checkbox"/> | <input type="checkbox"/> Flow cytometry         |
| <input checked="" type="checkbox"/> | <input type="checkbox"/> MRI-based neuroimaging |

## Antibodies

|                 |                                                                                                                                                                                                                                                                                                                                 |
|-----------------|---------------------------------------------------------------------------------------------------------------------------------------------------------------------------------------------------------------------------------------------------------------------------------------------------------------------------------|
| Antibodies used | <input type="text" value="Commercial antibodies:&lt;br/&gt;1. Mouse monoclonal anti-Flag (Sigma-Aldrich, Catalog No: F3165, dilution 1/300)&lt;br/&gt;2. Mouse monoclonal anti-Myc (Sigma-Aldrich, Catalog No: A5963, dilution 1/300)&lt;br/&gt;3. Rabbit anti-mouse IgG (Sigma-Aldrich, Catalog No: A9044, dilution 1/5000)"/> |
| Validation      | <input type="text" value="All antibodies were validated in western-blot with samples expressing tagged and un-tagged protein."/>                                                                                                                                                                                                |
